# Supplementary material for: Comparative Review of SARS-CoV-2, SARS-CoV, MERS-CoV, and Influenza A Respiratory Viruses
Source: PubMed Central journal article supplement (PMC7516028; doi:10.3389/fimmu.2020.552909), 2020-09-11
Supplement: Data_Sheet_1.pdf [file Data_Sheet_1.pdf]

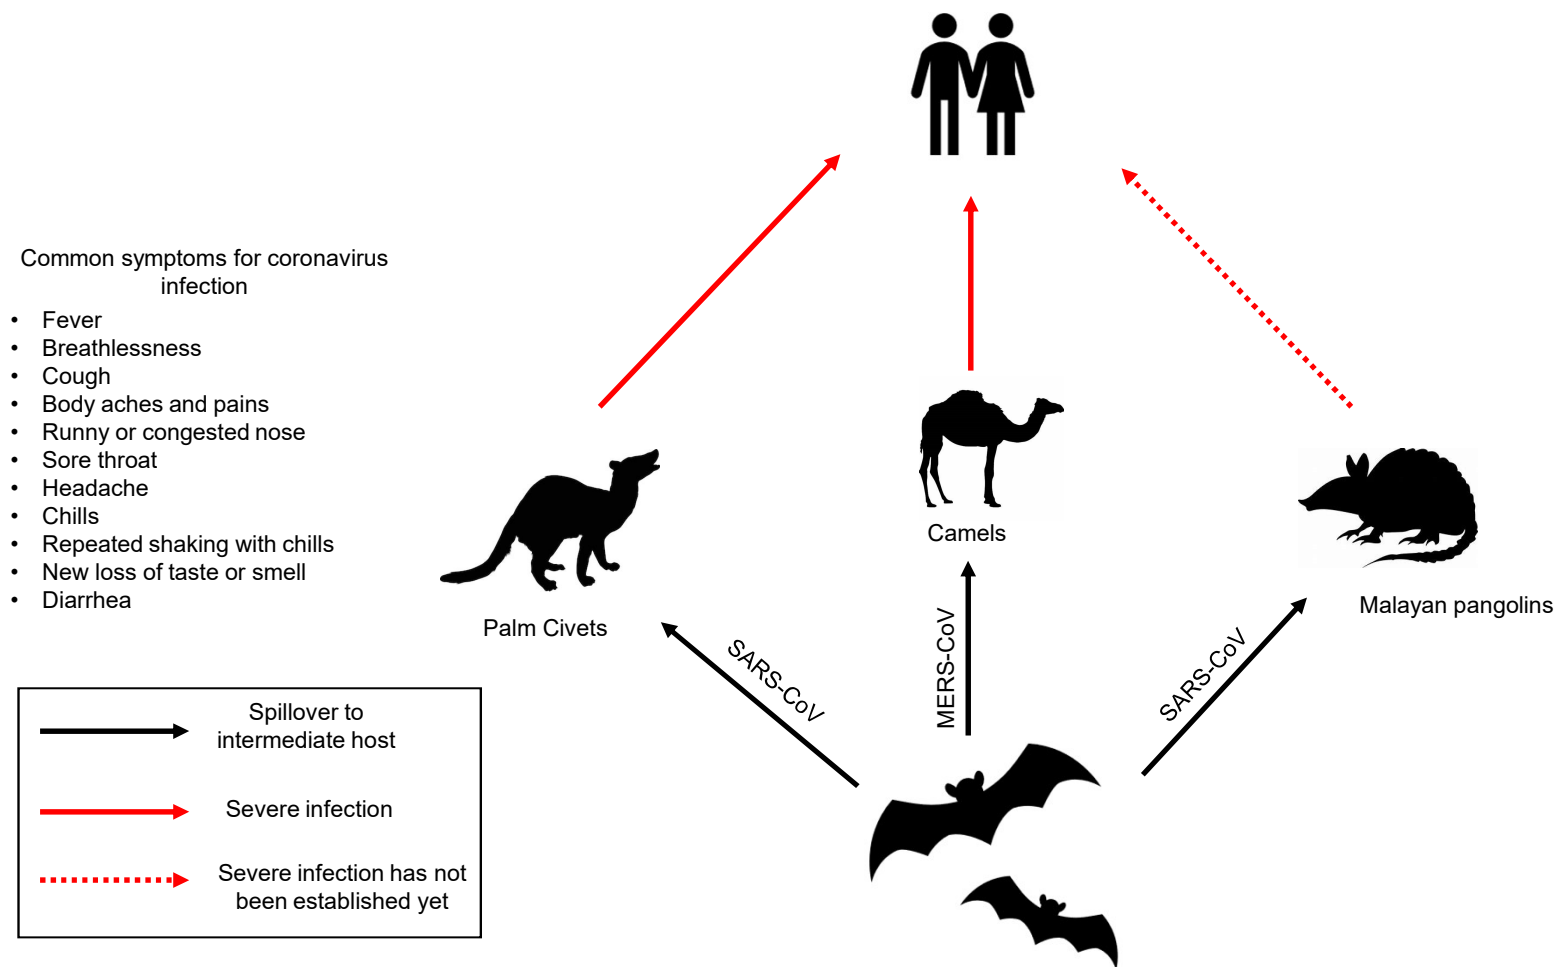

**Figure S1:** The origins and intermediate hosts of SARS-CoV-2, SARS-CoV, and MERS-CoV

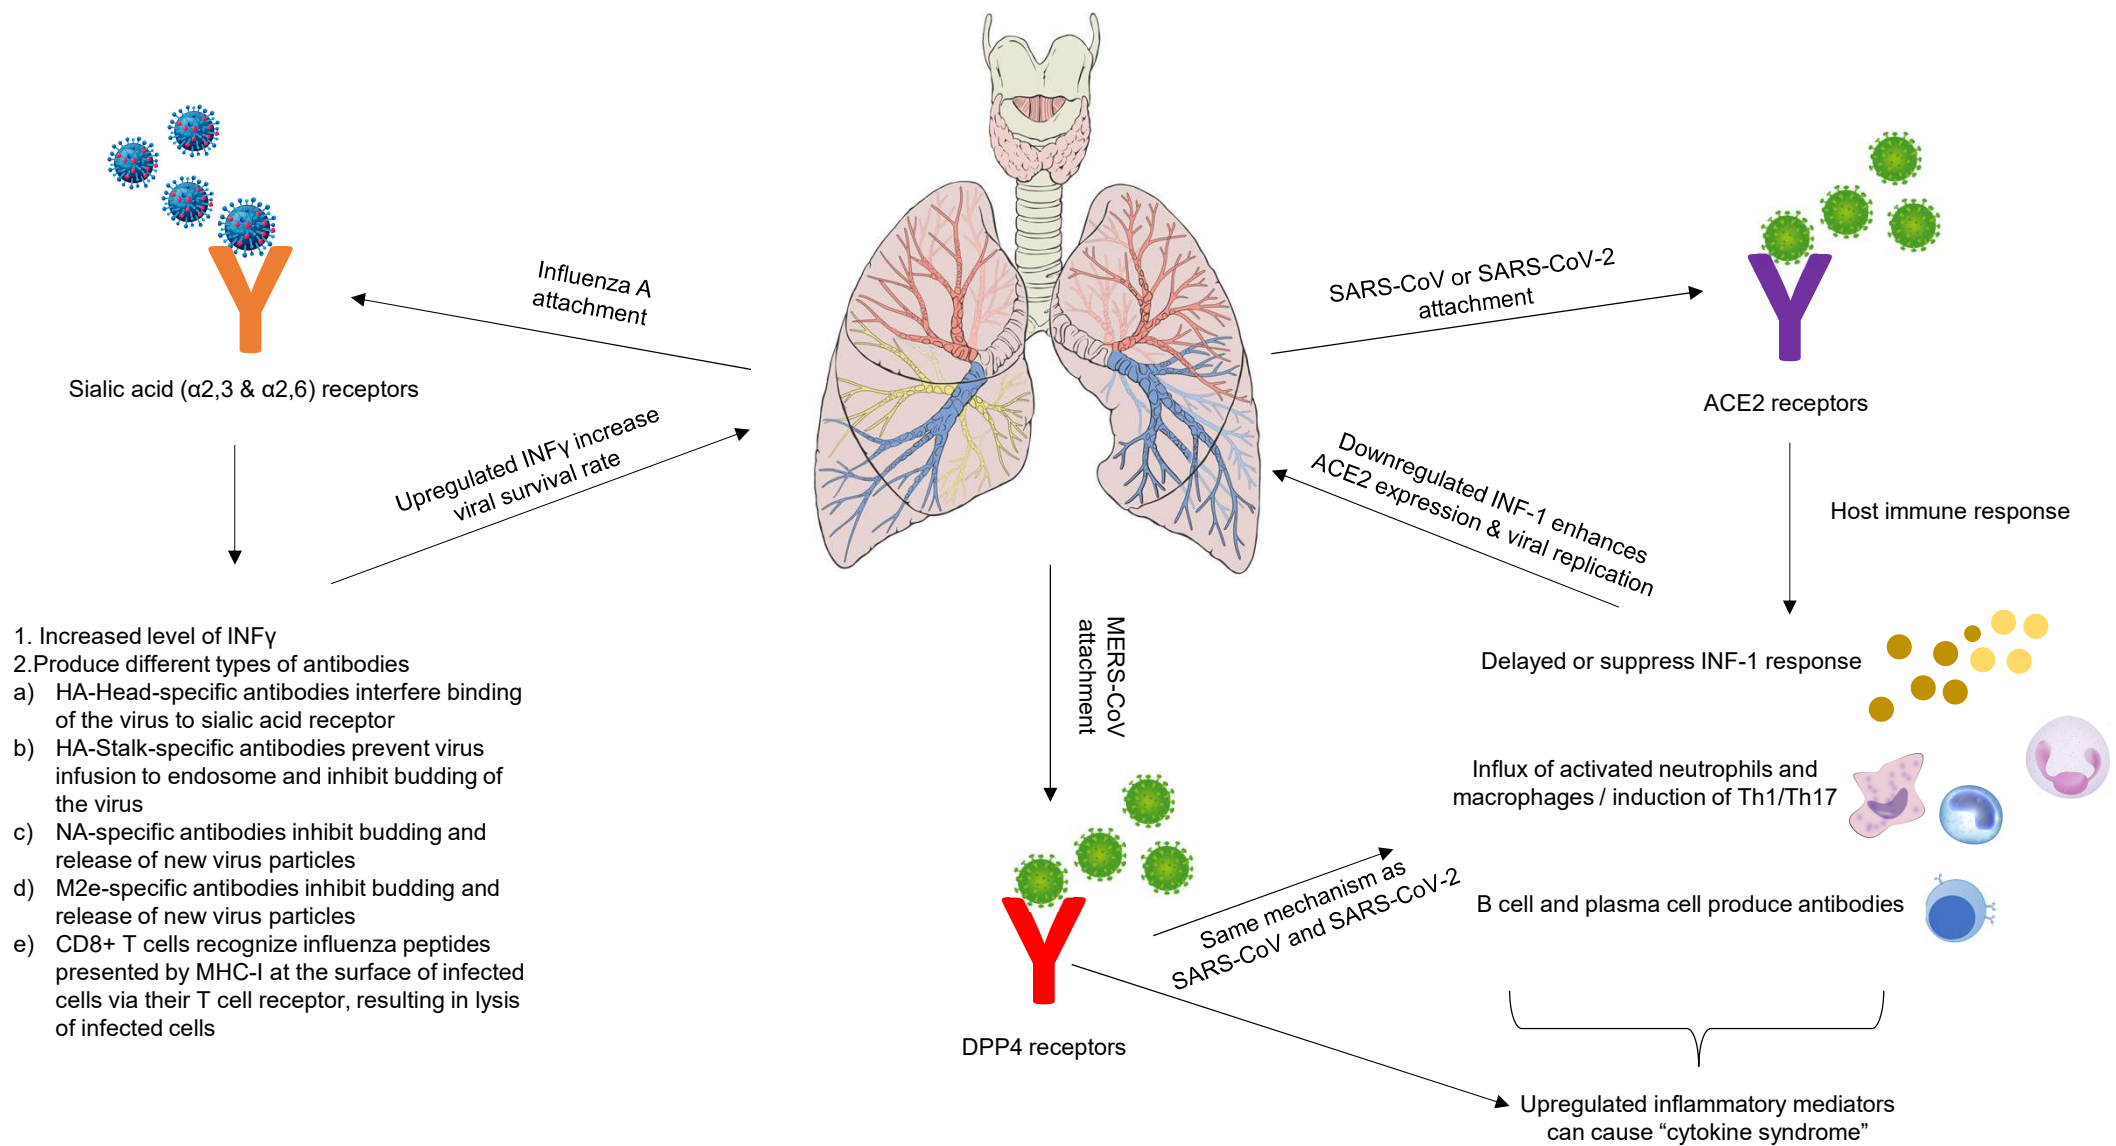

**Figure S2.** Virus-host interaction. Th1, T helper 1; Th17, T helper 17; ACE2, angiotensin-converting enzyme 2; INF-1, interferon 1; INF $\gamma$ , interferon gamma; DPP4, dipeptidyl peptidase-4; HA, hemagglutinin; NA, neuraminidase; M2e, Matrix 2 protein; MHC-1, major histocompatibility complex class 1.

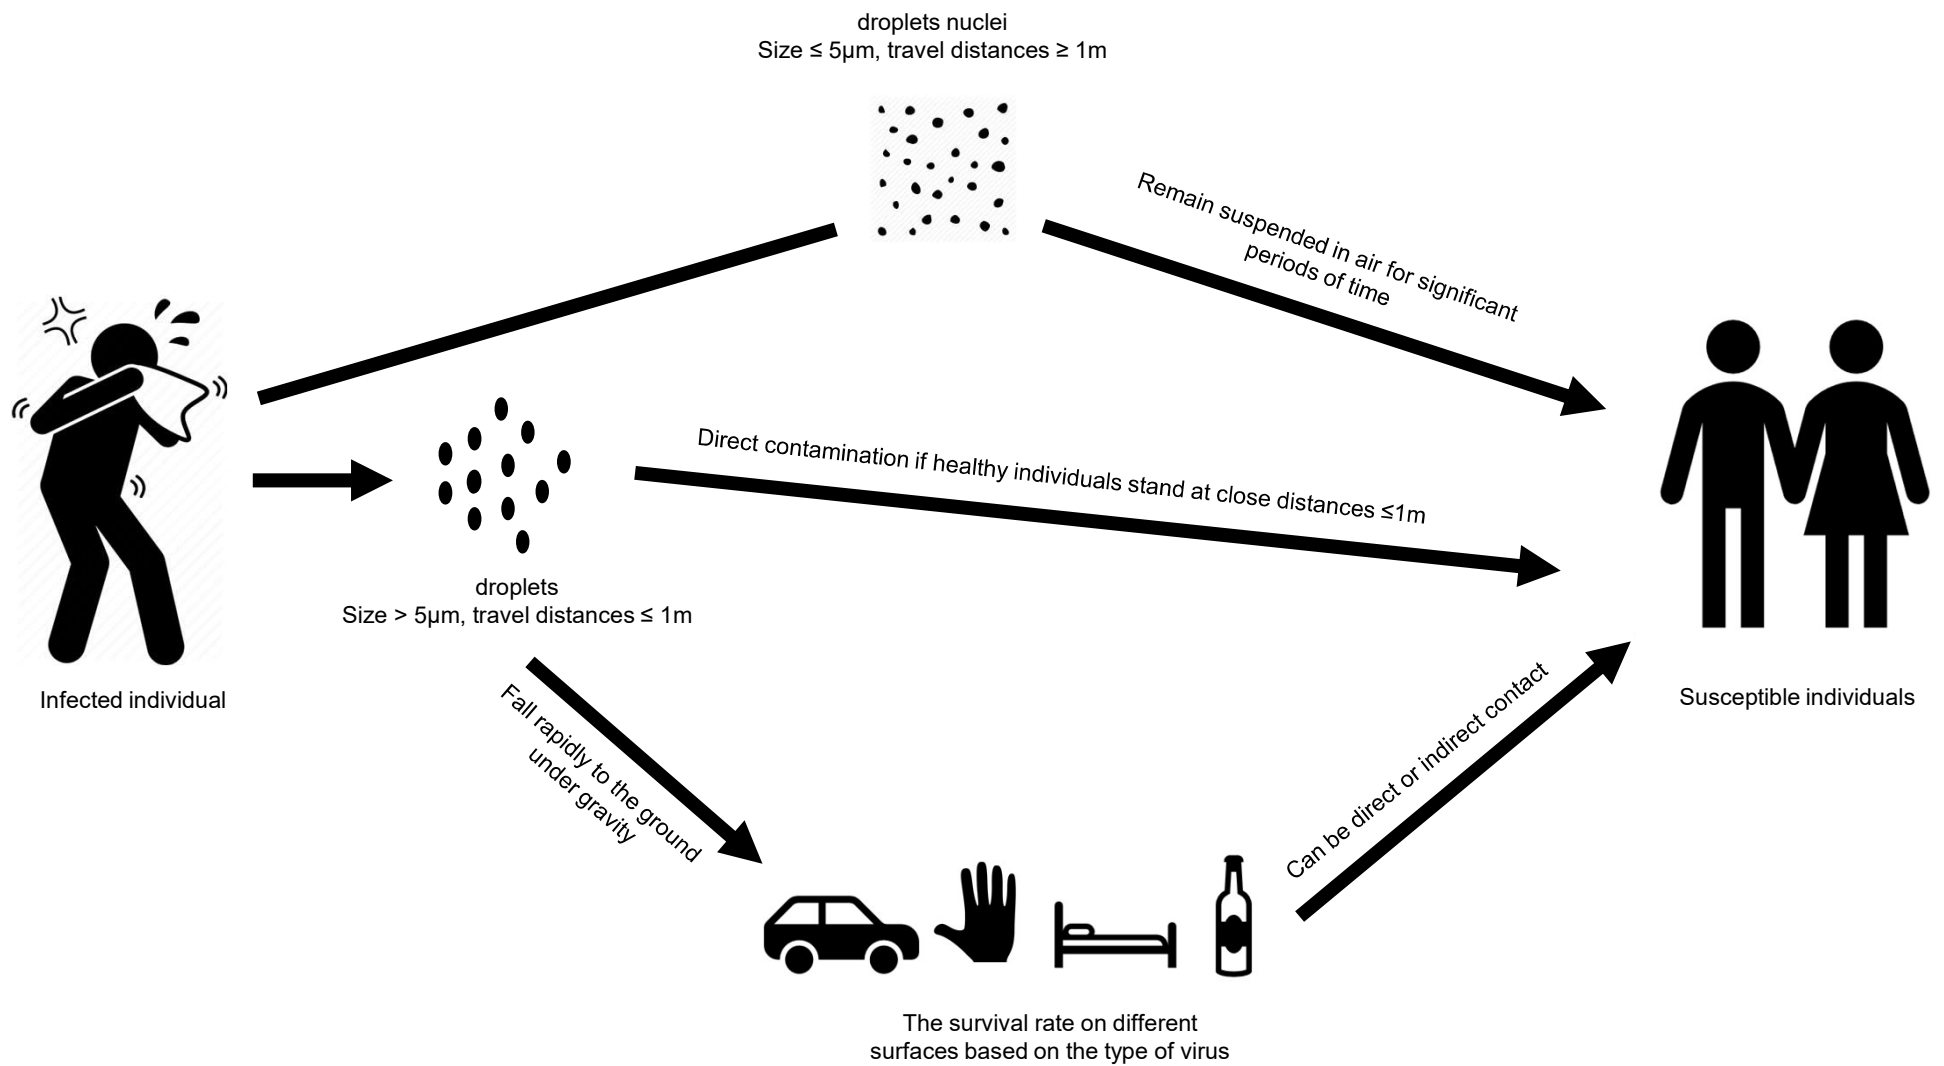

**Figure S3:** Potential transmission routes of respiratory infection between infected and susceptible individuals (112). Respiratory infections with a droplet nuclei size  $\leq 5\ \mu\text{m}$  can travel to a distance  $\geq 1\ \text{m}$ . In contrast, respiratory infections with a droplet nuclei size  $\geq 5\ \mu\text{m}$  cannot travel to a distance  $\geq 1\ \text{m}$ . Large droplets may fall on different surfaces and infect healthy individuals through direct or indirect contact.
